# Supplementary material for: Injectable Polypeptide Hydrogel Depots Containing Dual Immune Checkpoint Inhibitors and Doxorubicin for Improved Tumor Immunotherapy and Post-Surgical Tumor Treatment
Source: MDPI journal article supplement (doi:10.3390/pharmaceutics15020428), 2023-01-28
Supplement: s1 [file s1]

# Supplementary Materials: Injectable Polypeptide Hydrogel Depots Containing Dual Immune Checkpoint Inhibitors and Doxorubicin for Improved Tumor Immunotherapy and Post-Surgical Tumor Treatment

Zhixiong Chen, Yan Rong, Junfeng Ding, Xueliang Cheng, Xuesi Chen and Chaoliang He

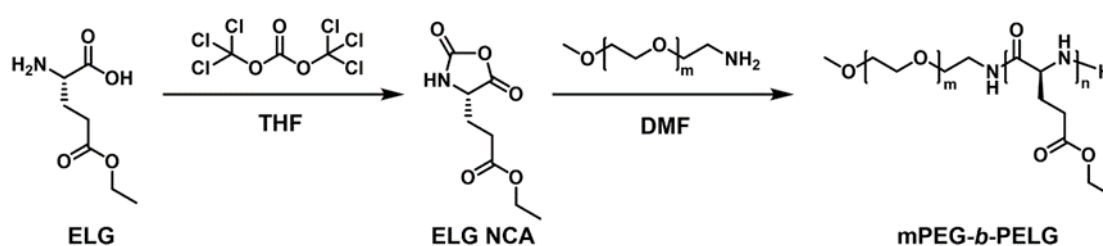

Scheme S1. Synthesis route for mPEG-PELG.

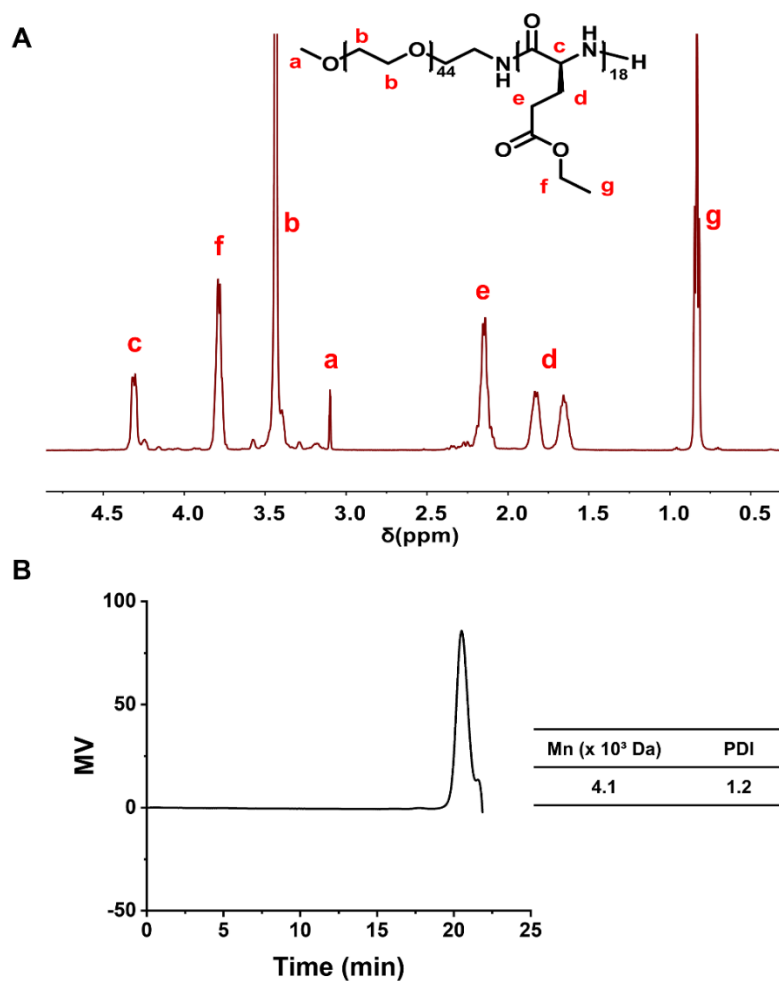

**Figure S1.** (A)  $^1\text{H}$  NMR spectrum of mPEG-PELG in  $\text{CF}_3\text{COOD}$ . (B) GPC data of mPEG-PELG.

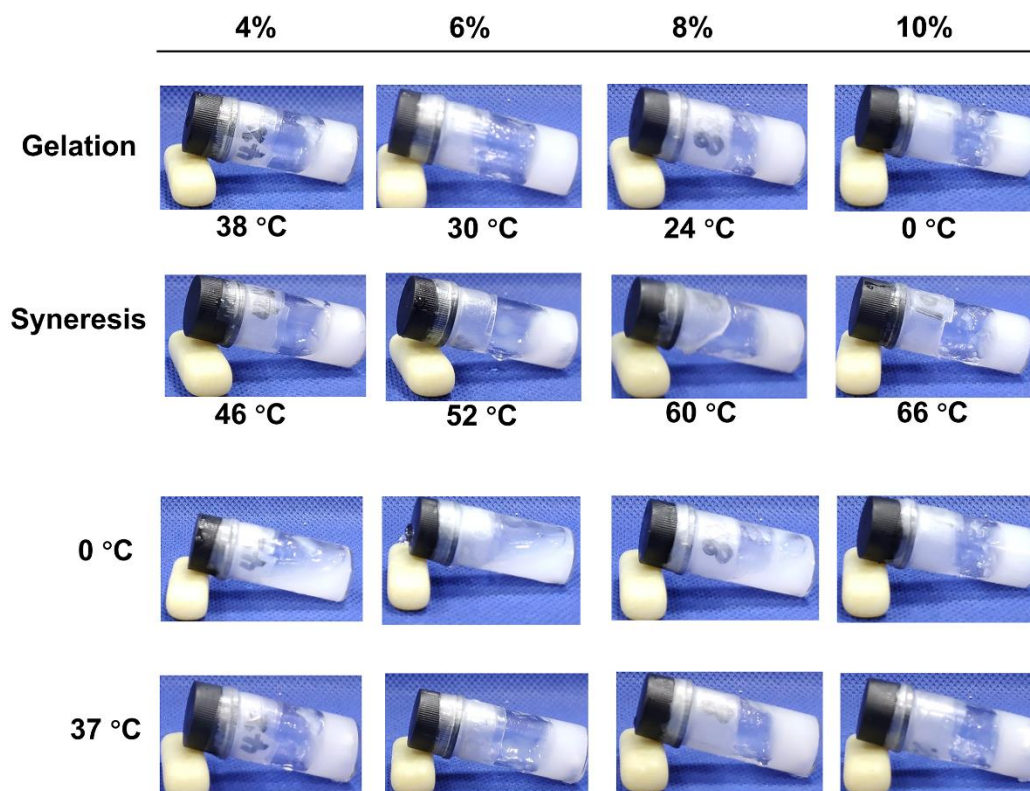

**Figure S2.** Photographs of the mPEG-PELG (4–10 wt%) at different temperatures. The gelation temperatures and syneresis temperatures were marked specially.

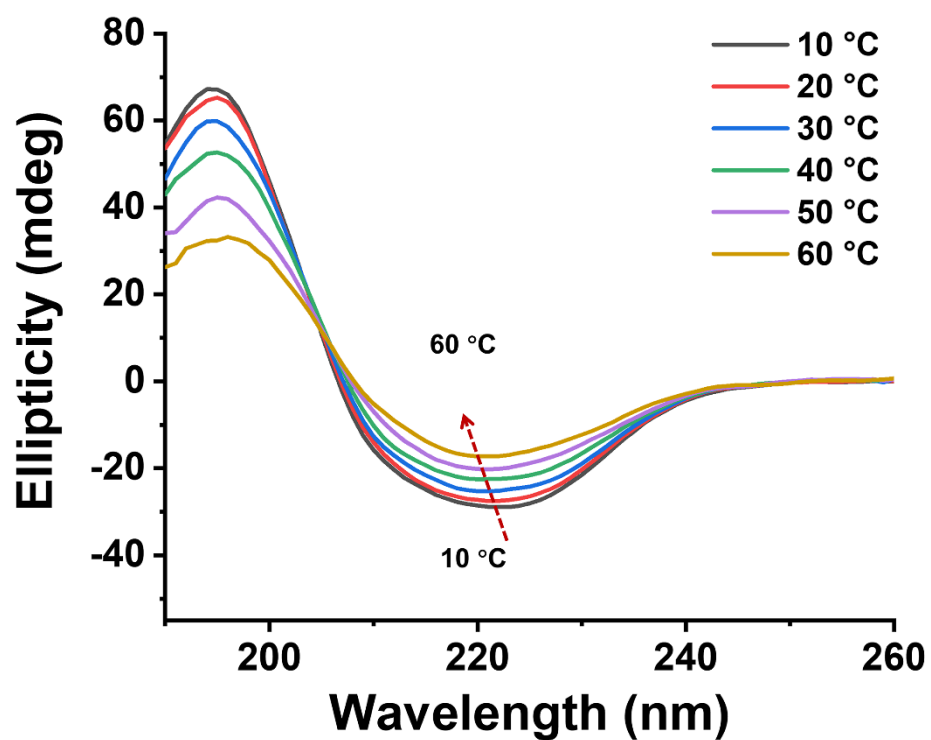

**Figure S3.** The ellipticity of polymer aqueous solution (0.05 wt%) with increasing temperature from 10 to 60 °C.

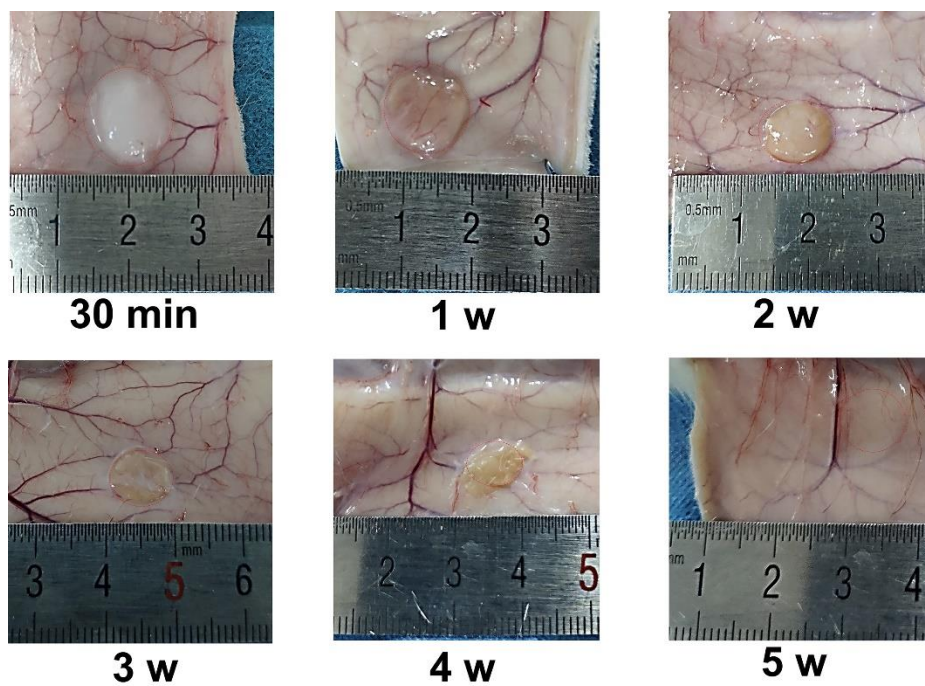

**Figure S4.** Photographs of the hydrogels after injection into the subcutaneous layer of rats at different time points.

# A Zero-order

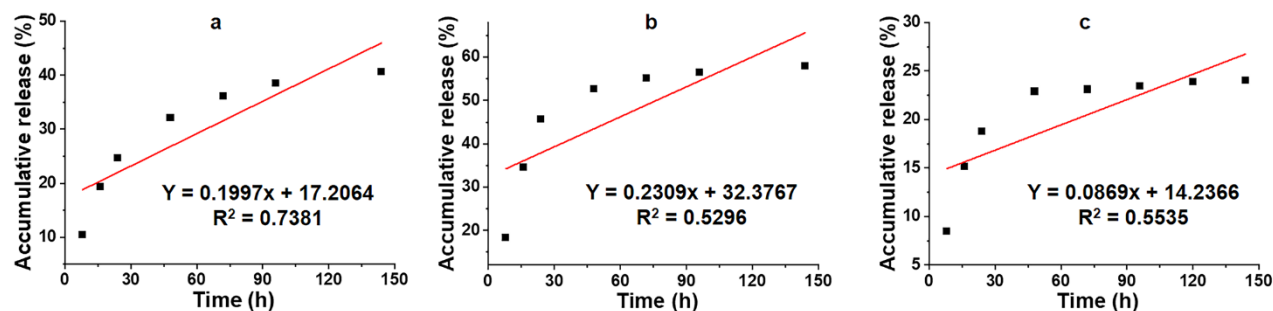

# B First-order

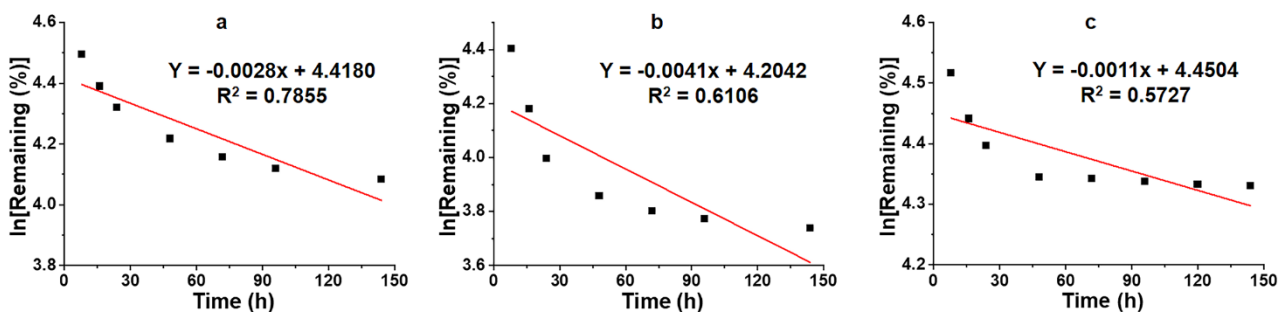

# C Korsmeyer-Peppas

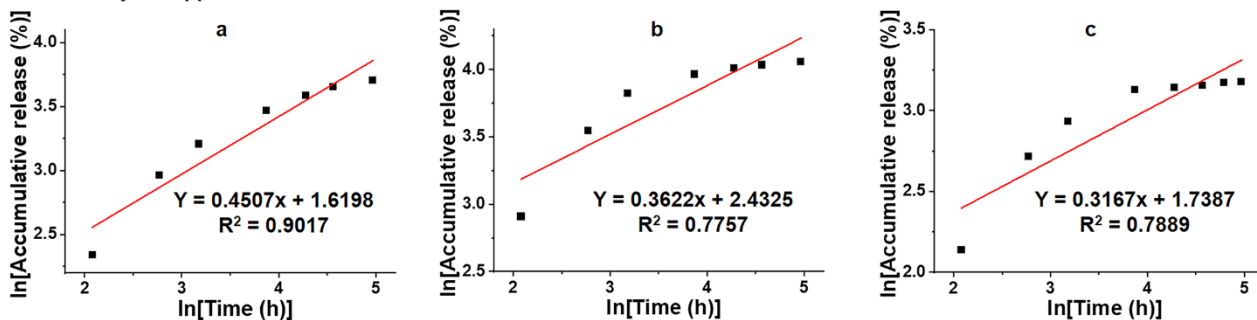

# D Higuchi

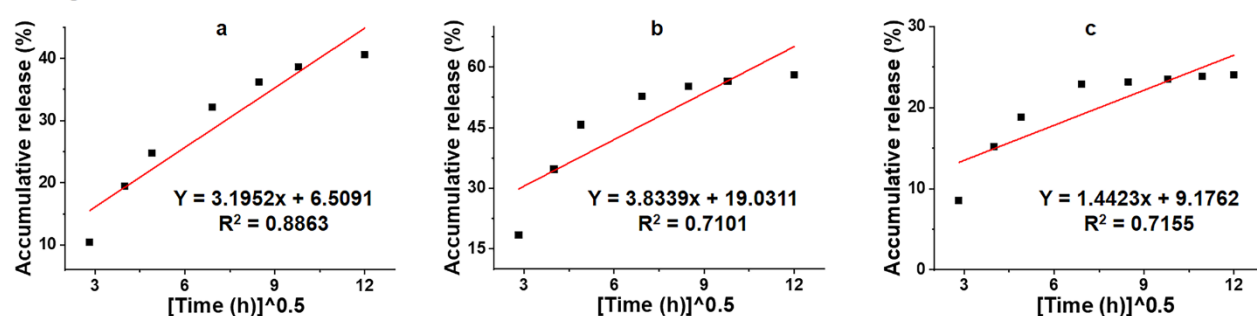

**Figure S5.** Fitting of the in vitro drug release data to kinetic models of zero-order model (A), first-order model (B), Korsmeyer-Peppas model (C) and Higuchi model (D) [43–45]. (a) Dox release from Dox-loaded hydrogel in PBS; (b) Dox release from Dox-loaded hydrogel in PBS containing proteinase K; (c) IgG release from IgG-loaded hydrogel in PBS.

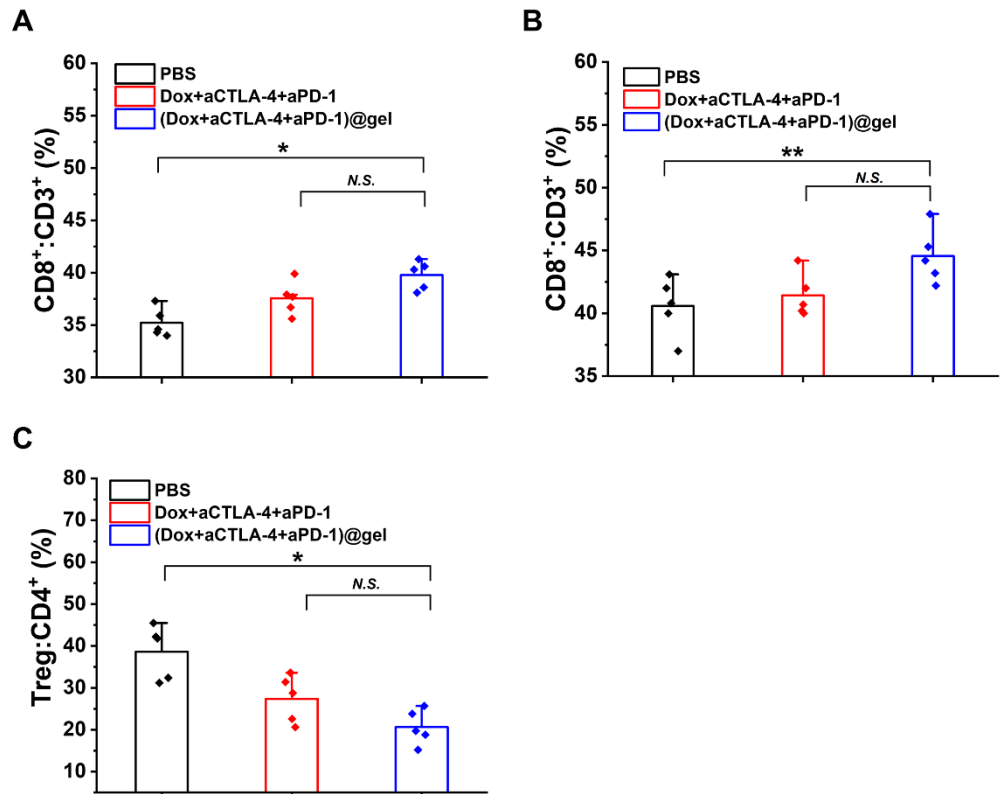

**Figure S6.** Immune cell analysis data of spleens, lymph nodes and tumors of the post-operative mice model after receiving various treatments, obtained by flow cytometry. (A) The ratio of CD8<sup>+</sup>:CD3<sup>+</sup> in spleen (n = 5). (B) The ratio of CD8<sup>+</sup>:CD3<sup>+</sup> in lymph nodes (n = 5). (C) The ratio of Tregs:CD4<sup>+</sup> in tumor (n = 5).
